# Supplementary material for: A High-Throughput, High-Containment Human Primary Epithelial Airway Organ-on-Chip Platform for SARS-CoV-2 Therapeutic Screening
Source: MDPI journal article supplement (doi:10.3390/cells12222639), 2023-11-16
Supplement: s1 [file s1]

Supplementary Materials for

# **A High-Throughput, High-Containment Human Primary Epithelial Airway Organ-on-Chip Platform for SARS-CoV-2 Therapeutic Screening**

Christine R. Fisher<sup>†</sup>, Felix Mba Medie<sup>†</sup>, Rebecca J. Luu<sup>†</sup>, Robert B. Gaibler, Thomas J. Mulhern, Caitlin R. Miller, Chelsea Zhang, Logan D. Rubio, Elizabeth E. Marr, Vidhya Vijayakumar, Elizabeth P. Gabriel, Landys Lopez Quezada, Chun-Hui Zhang, Karen S. Anderson, William L. Jorgensen, Jehan W. Alladina, Benjamin D. Medoff, Jeffrey T. Borenstein and Ashley L. Gard\*

<sup>†</sup>Authors contributed equally

\*Corresponding author. Email: [agard@draper.com](mailto:agard@draper.com)

## **This file includes:**

Table S1

Figures S1 to S4

| Primers, Probes and TaqMan® Assays   | Vendor, Catalogue/Assay Number   |
|--------------------------------------|----------------------------------|
| nCOV_N1 Forward Primer               | IDT, 10006830                    |
| nCOV_N1 Reverse Primer               | IDT, 10006831                    |
| nCOV_N1 Probe                        | IDT, 10006832                    |
| nCOV_N2 Forward Primer               | IDT, 10006833                    |
| nCOV_N2 Reverse Primer               | IDT, 10006834                    |
| nCOV_N2 Probe                        | IDT, 10006835                    |
| RNase P Forward Primer               | IDT, 10006836                    |
| RNase P Reverse Primer               | IDT, 10006837                    |
| RNase P Probe                        | IDT, 10006838                    |
| ACE2 TaqMan Gene Expression Assay    | Thermo Scientific, Hs01085333_m1 |
| TMPRSS2 TaqMan Gene Expression Assay | Thermo Scientific, Hs01122322_m1 |
| SCGB1A1 TaqMan Gene Expression Assay | Thermo Scientific, Hs00171092_m1 |
| Muc5AC TaqMan Gene Expression Assay  | Thermo Scientific, Hs01365616_m1 |
| FoxJ1 TaqMan Gene Expression Assay   | Thermo Scientific, Hs00230964_m1 |
| TP63 TaqMan Gene Expression Assay    | Thermo Scientific, Hs00978340_m1 |

**Table S1.**

Primers, probes and TaqMan® Assays used in RT-qPCR assays.

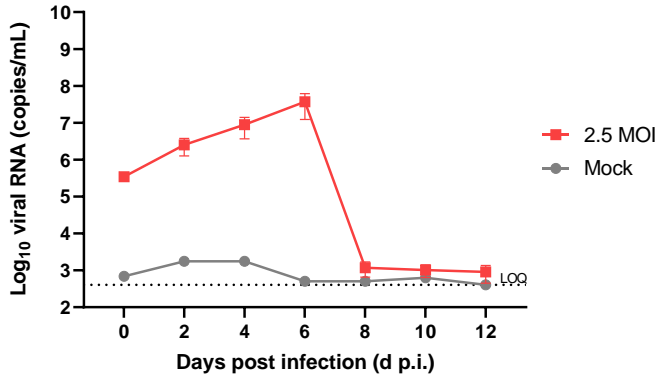

**Figure S1.**

Type RT-qPCR analyses for SARS-CoV-2 nucleoprotein RNA copies in the apical wash of PREDICT96-ALI airway tissue from donor 04401 (N = 6 tissue replicates for mock, N = 6 for 2.5 MOI) at 0, 2, 4, 6, 8, 10, and 12 days post infection (d p.i.). Infection peaked at 6 d p.i. Limit of quantification (LOQ, dotted line): Log<sub>10</sub> viral RNA (copies/ml) corresponding to cycle threshold values  $\geq 37$ .

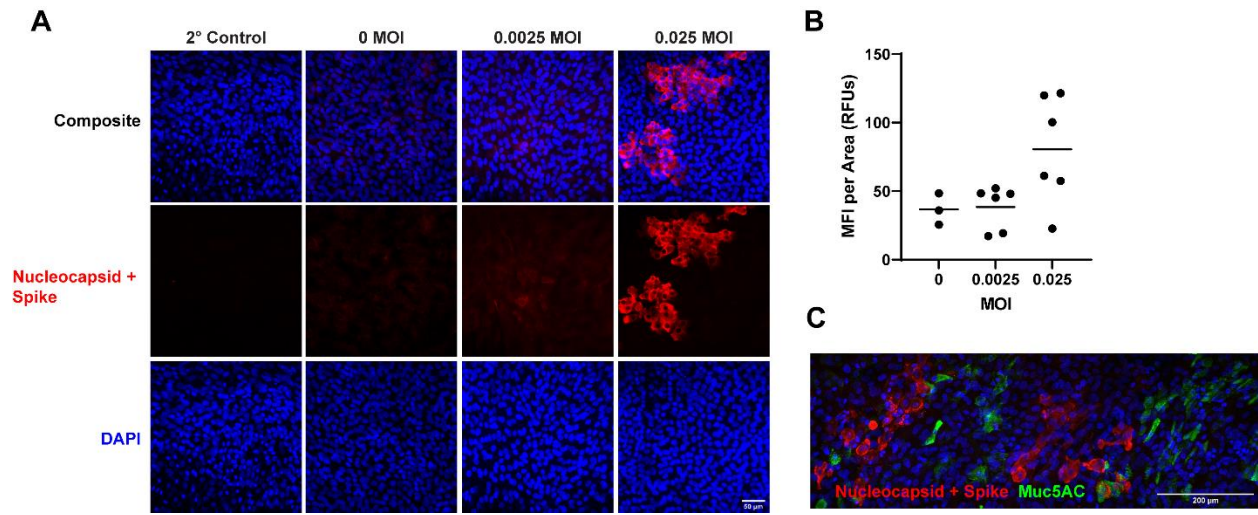

**Figure S2.**

Immunofluorescence staining of SARS-CoV-2-inoculated PREDICT96-ALI airway tissues from donor DH01. (A) Max projection immunofluorescence images depicting positive staining of the SARS-CoV-2 spike and nucleocapsid proteins (S and N, respectively, red) and dsDNA nucleic acids (Hoechst 33342, blue) within PREDICT96-ALI airway tissue from donor DH01. Tissues were fixed with 4% paraformaldehyde at 6 d p.i. following inoculation with SARS-CoV-2 USA-WA1/2020 (MOI 0, 0.0025 or 0.025). Secondary antibody control showed low background noise. Images were taken at 40x magnification and are shown with a 50 µm scale bar. One representative region of interest (ROI) from N = 1 tissue device shown per MOI. (B) Mean Fluorescent Intensity (MFI) image quantification of SARS-CoV-2 infection in PREDICT96-ALI airway tissues associated with panel A. MFI from the red channel (S and N proteins) indicate a trend of increased signal in the 0.025 MOI condition, but is not significant compared to the 0 or 0.0025 MOI conditions. The average MFI of the 0 (N = 3 tissue replicates), 0.0025 (N = 6 tissue replicates), and 0.025 MOI (N = 6 tissue replicates) are  $36.67 \pm 11.45$ ,  $38.38 \pm 15.75$ ,  $80.52 \pm 39.69$  RFUs (mean  $\pm$  standard deviation), respectively. Images were taken at 10x magnification and analyzed for MFI using ImageJ Fiji. (C) Representative max projection immunofluorescence image of SARS-CoV-2 positivity (S and N proteins, red), goblet cells (Muc5AC, green) and dsDNA nucleic acids (Hoechst 33342, blue) within PREDICT96-ALI airway tissue from donor DH01 at 6 d.p.i. following inoculation with SARS-CoV-2 at 0.025 MOI. Image was taken at 40x magnification and is shown with a 200 µm scale bar.

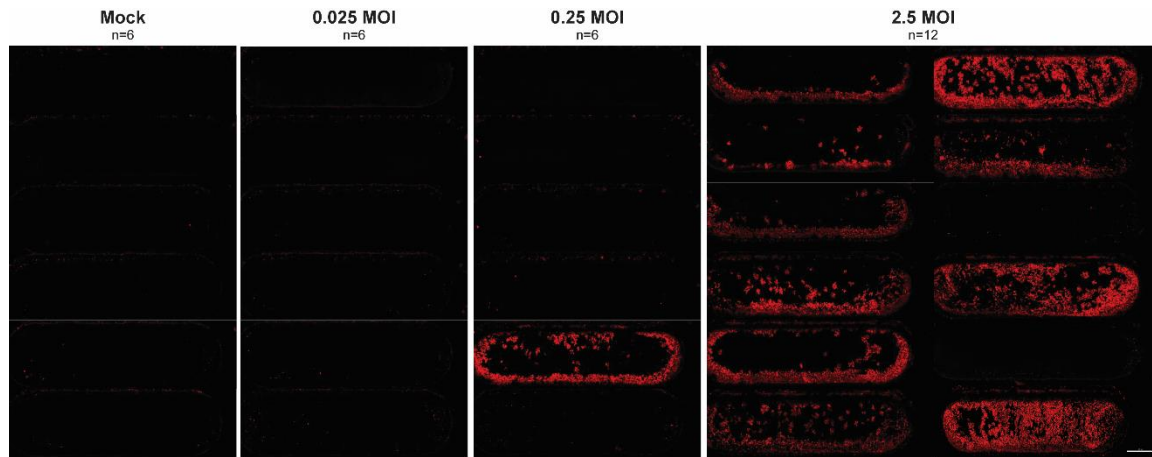

**Figure S3.**

Tile scan images depicting SARS-CoV-2 positivity (Nucleocapsid, red) in 30 devices of PREDICT96-ALI airway tissues from donor 04401 at 6 d p.i. following inoculation with SARS-CoV-2 at 0, 0.025, 0.25, and 2.5 MOI. Images were used for MFI quantification (see figure 3B). Images were taken at 10x magnification and are shown with a 500  $\mu\text{m}$  scale bar.

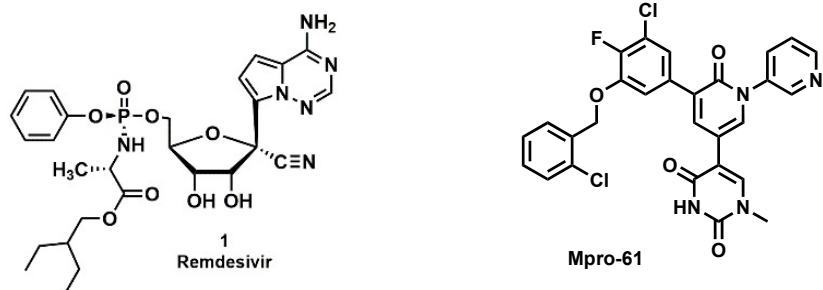

**Figure S4.**

Antivirals evaluated in SARS-CoV-2-inoculated PREDICT96-ALI tissues. Remdesivir, a SARS-CoV-2 RNA-dependent RNA polymerase inhibitor (left) and Mpro-61, a SARS-CoV-2 protease inhibitor (right).
